# Supplementary material for: Functional dissection and assembly of a small, newly evolved, W chromosome-specific genomic region of the African clawed frog Xenopus laevis
Source: PLoS Genet. 2023 Oct 4;19(10):e1010990. doi: 10.1371/journal.pgen.1010990 (PMC10578606; doi:10.1371/journal.pgen.1010990)
Supplement: S4 Table — Reads include sequences captured by probes described here (dm-w exon 4, scan-w exon 4 and 5, ccdc69-w exons 1 and 2) and also probes for other regions (scan-w exons 1–3, 6, androgen receptor exons 1–8, and SRY-related HMG-box exon 1) that were not included in this study. (XLSX) [file pgen.1010990.s014.xlsx]

## Sheet: Sheet1
Table S4. Description of the samples used for the capture sequencing (Species, Field and Museum ID, Locality, Ploidy, Sex) and the number of reads (Reads) obtained from each library. Reads include sequences captured by probes described here (dm-w exon 4, scan-w exon 4 and 5, ccdc69-w exons 1 and 2) and also probes for other regions (scan-w exons 1-3, 6, androgen receptor exons 1-8, and SRY-relate…
Species	Field ID	Museum ID	Locality	Ploidy	Sex	Reads
Subgenus Silurana
X. tropicalis	AMNH17274	Voucher lost (MNHG)	Sierra Leone - near Freetown	diploid	F	5675852
X. epitropicalis	AMNH17278	Voucher lost (MNHG)	DRC - Kinshasa	tetraploid	F	6382877
X. mellotropicalis	AMNH17288	Voucher lost (MNHG)	Cameroon - Nkoemvone	tetraploid	M	5157396
X. calcaratus	VG09-364	NMP6V 74630/1	Cameroon - Bakingili	tetraploid	F	6101758
Subgenus Xenopus
X. clivii	AMNH17254	MHNG2645.069	Ethiopia - near Addis Ababa	tetraploid	F	6331894
X. muelleri	Xen203	No voucher	Tanzania - Ifakara	tetraploid	F	4740767
X. borealis	AMNH17315	Voucher lost (MNHG)	Kenya - Samburu Range	tetraploid	F	6743326
X. fischbergi	AMNH17297	Voucher lost (MNHG)	Nigeria - Jos	tetraploid	F	5022163
X. largeni	AMNH17292	MHNG2644.059	Ethiopia - near Kibre Mengist	tetraploid	F	5434544
X. pygmaeus	AMNH17320	Voucher lost (MNHG)	DRC - Boende	tetraploid	M	5858126
X. allofraseri	BJE3488	MCZ A-148164	Equatorial Guinea - Comedor	tetraploid	F	4902167
X. parafraseri	AMNH17282	MHNG2645.084	Cameroon - Yaounde	tetraploid	F	4784793
X. gilli	Xr(0-3)	No voucher	South Africa	tetraploid	F	5260560
X. petersii	AMNH17325	MHNG2645.094	Congo Rep - near town of Koulila	tetraploid	F	4483219
X. victorianus	xen234	No voucher	Uganda - Kitanga	tetraploid	F	5566946
X. poweri	AMNH17260	MHNG2645.073	Nigeria - Jos	tetraploid	F	6381699
X. laevis	kml(5)	No voucher	South Africa - Kleinmond	tetraploid	F	6710981
X. amieti	AMNH17268	MHNG2645.079	Cameroon - Galim	octoploid	F	6221683
X. wittei	AMNH17307	MHNG2645.092	Uganda - Chelima Forest	octoploid	F	6003435
X. boumbaensis	AMNH17284	MHNG2644.057	Cameroon - Moloundou	octoploid	F	6949151
X. andrei	AMNH17258	MHNG2645.072	Cameroon - Longyi	octoploid	F	6410561
X. itombwensis	BJE00275	MCZ A-138192	DRC - Miki	octoploid	M	6459600
X. lenduensis	BJE2973	MCZ A-140111	DRC - Emilio	octoploid	M	5080567
X. vestitus	RT2	No voucher	Uganda - near Kisoro	octoploid	F	6738458
X. boumbaensis	AMNH17283	MHNG2645.085	Cameroon - Moloundou	octoploid	M	5839429
X. ruwenzoriensis	AMNH17317	Voucher lost (MNHG)	Uganda - Semliki Forest	dodecaploid	F	7104504
X. kobeli	BJE3075	MCZ A-148037	Cameroon - Meganme	dodecaploid	F	4875056
X. eysoole	BJE3218	MCZ A-148095	Cameroon - Nkambe	dodecaploid	F	5791020
X. longipes	BJE3190	MCZ A-148072	Cameroon - Lake Oku	dodecaploid	F	5662580
